# Supplementary material for: An autocrine/paracrine circuit of growth differentiation factor (GDF) 15 has a role for maintenance of breast cancer stem-like cells
Source: PubMed Central journal article supplement (PMC5421895; doi:10.18632/oncotarget.15276), 2017-02-11
Supplement: oncotarget-08-24869-s001.pdf [file oncotarget-08-24869-s001.pdf]

## An autocrine/paracrine circuit of growth differentiation factor (GDF) 15 has a role for maintenance of breast cancer stem-like cells

### SUPPLEMENTARY MATERIALS TABLES

Supplementary Table 1: Detailed information of the clinical samples used for sphere formation assay

| Sample ID | Passages number | Subtype           | Sphere formation |
|-----------|-----------------|-------------------|------------------|
| 1         | 4               | Luminal B HER2(+) | -                |
| 2         | 1               | Luminal A         | +                |
| 3         | 2               | Luminal B HER2(-) | -                |
| 4         | 2               | Luminal A         | -                |
| 5         | 1               | Luminal B HER2(-) | -                |
| 6         | 6               | Luminal A         | +                |
| 7         | 0               | Luminal A         | -                |
| 8         | 0               | Luminal A         | -                |

**Supplementary Table 2: Detailed information of the clinical breast cancer tissue samples used for immunohistochemistry**

| Case ID | Specimen    | Subtype             | Nuclear grade | Lymph node status | Pathological stage | GDF15 positive cells(%) |
|---------|-------------|---------------------|---------------|-------------------|--------------------|-------------------------|
| 1       | Breast      | Luminal A           | 1             | -                 | I                  | 0                       |
| 2       | Breast      | Luminal A           | 1             | +                 | IIA                | 0.1                     |
| 3       | Breast      | Luminal A           | 2             | +                 | IIA                | 4.7                     |
| 4       | Breast      | Luminal A           | 1             | -                 | I                  | 0.1                     |
| 5       | Breast      | Luminal A           | 1             | -                 | I                  | 2.7                     |
| 6       | Breast      | Luminal B           | 1             | -                 | I                  | 0                       |
| 7       | Breast      | Luminal B           | 1             | +                 | IV                 | 62.4                    |
| 8       | Breast      | Luminal B           | 3             | +                 | IIA                | 7.1                     |
| 9       | Breast      | Luminal B           | 2             | -                 | I                  | 8                       |
| 10      | Breast      | Luminal B           | 2             | +                 | IIB                | 4.9                     |
| 11      | Breast      | LuminalB<br>HER2(+) | 2             | -                 | I                  | 2                       |
| 12      | Lymph node  | LuminalB<br>HER2(+) | 3             | +                 | IIIA               | 3.8                     |
| 13      | Breast      | LuminalB<br>HER2(+) | 1             | -                 | I                  | 0.1                     |
| 14      | Breast      | LuminalB<br>HER2(+) | 3             | -                 | IIA                | 0.2                     |
| 15      | Breast      | LuminalB<br>HER2(+) | 1             | -                 | I                  | 18.1                    |
| 16      | Breast      | HER2(+)             | 3             | -                 | I                  | 42                      |
| 17      | Soft tissue | HER2(+)             | 2             | +                 | IV                 | 7.8                     |
| 18      | Breast      | HER2(+)             | 2             | -                 | I                  | 67.8                    |
| 19      | Breast      | HER2(+)             | 2             | +                 | IIIA               | 8.9                     |
| 20      | Breast      | HER2(+)             | 3             | -                 | IIA                | 3.4                     |
| 21      | Breast      | Triple negative     | 3             | -                 | IV                 | 0.7                     |
| 22      | Skin        | Triple negative     | 3             | +                 | IV                 | 0.1                     |
| 23      | Breast      | Triple negative     | 3             | -                 | IIA                | 0                       |
| 24      | Breast      | Triple negative     | 3             | -                 | I                  | 0.2                     |
| 25      | Breast      | Triple negative     | 3             | -                 | I                  | 0.3                     |
